# Supplementary material for: Efficacy of a Chitin-Based Water-Soluble Derivative in Inducing Purpureocillium lilacinum against Nematode Disease (Meloidogyne incognita)
Source: MDPI journal article supplement (doi:10.3390/ijms22136870), 2021-06-26
Supplement: s1 [file s1]

Appendix A. Supplementary data

Efficacy of chitin-based water-soluble derivative as an environmental nematicidal candidate in inducing *Paecilomyces lilacinus* against nematode disease (*Meloidogyne incognita*)

Table S 1 The physical and chemical properties of 6-oxychitin

| Sample      | Water solubility<br>(mg/ml) | Mw (Da) | OD (%) | Carboxylate<br>content(mmol/g) |
|-------------|-----------------------------|---------|--------|--------------------------------|
| 6-Oxychitin | 26.57                       | 2100    | 16.28  | 0.974                          |

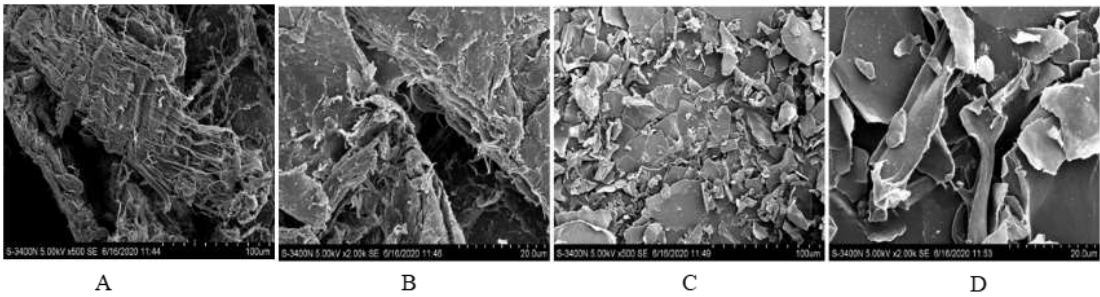

Figure S 1 The morphology of chitin (A、B) and oxidized chitin (C、D) under Scanning Electron Microscope. A and C are at 500 times magnification; B and D are at 2000 times magnification.
